# Supplementary material for: Coumarin bearing triazole hybrids as cholinesterase inhibitors targeting Alzheimer's disease
Source: Royal Society of Chemistry journal article supplement (doi:10.1039/d5ra09311b), 2026-04-20

Fig. S1. <sup>1</sup>H NMR of 12a

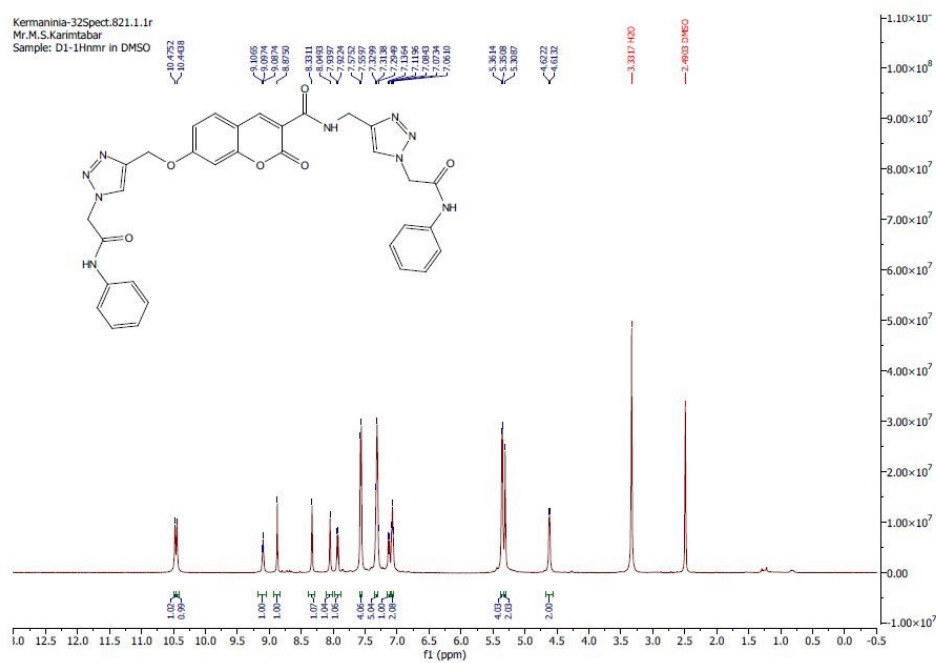

Fig. S2. <sup>13</sup>C NMR of 12a

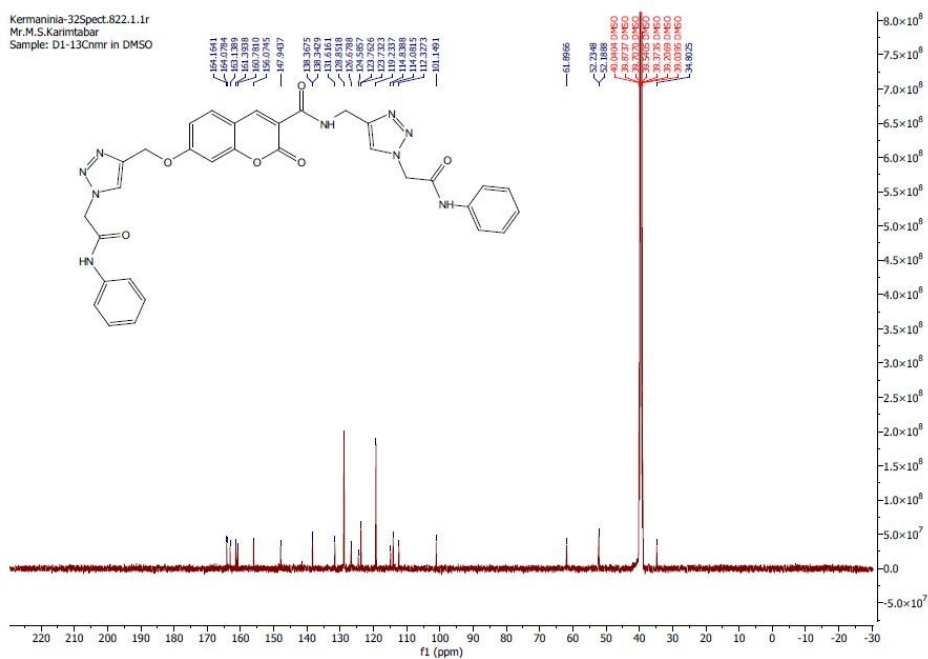





Fig. S7. HPLC of 12c

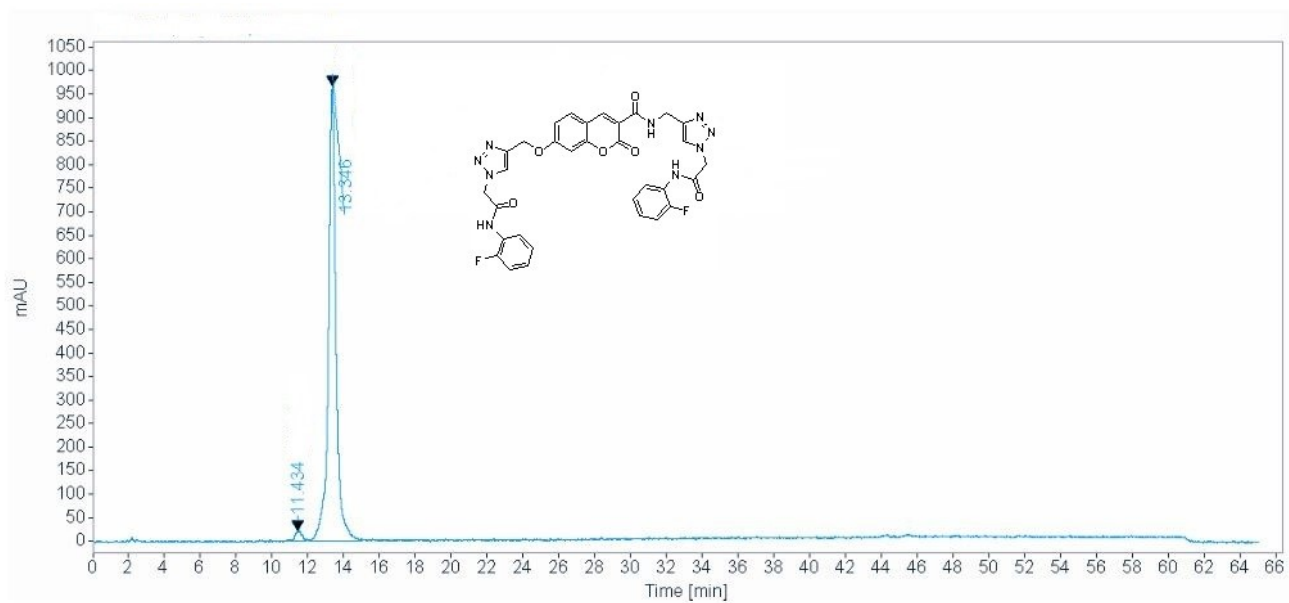



Fig. S10. <sup>1</sup>H NMR of 12e

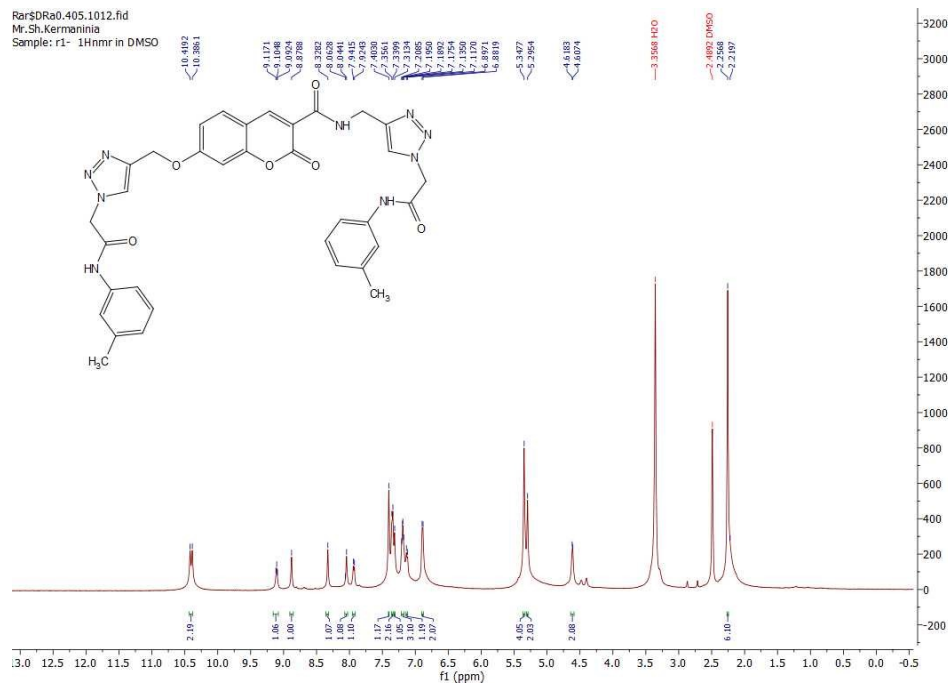

Fig. S11. <sup>13</sup>C NMR of 12e

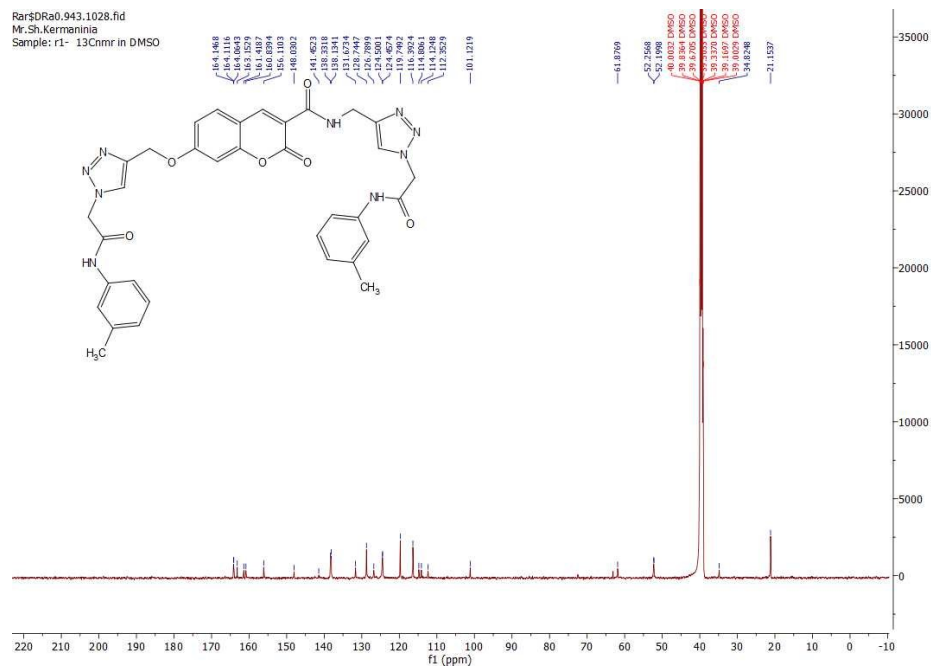



Fig. S14. <sup>1</sup>H NMR of 12g

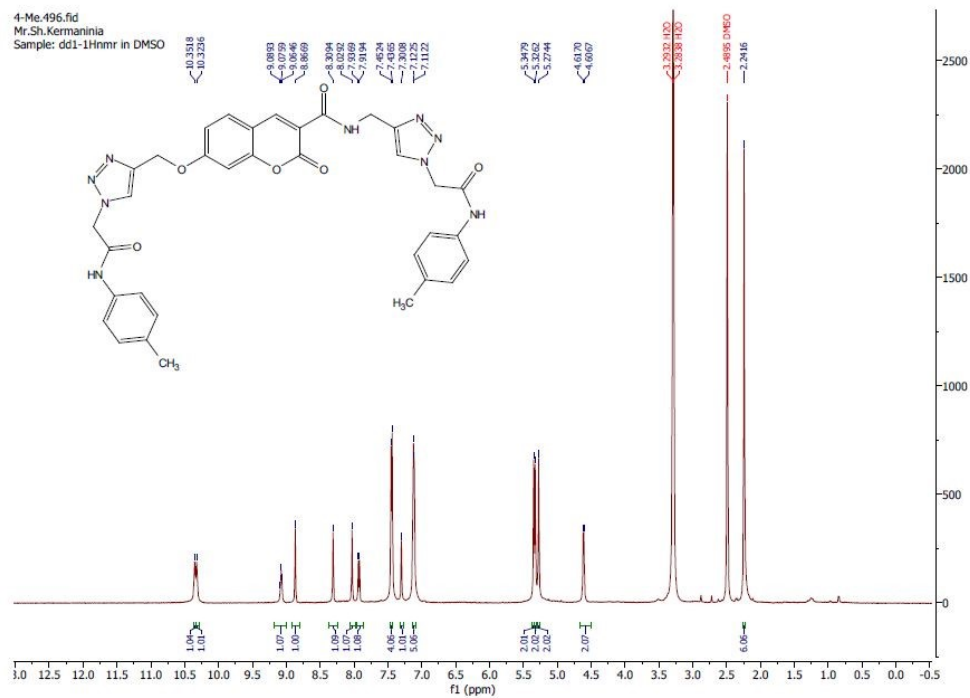

Fig. S15. <sup>13</sup>C NMR of 12g

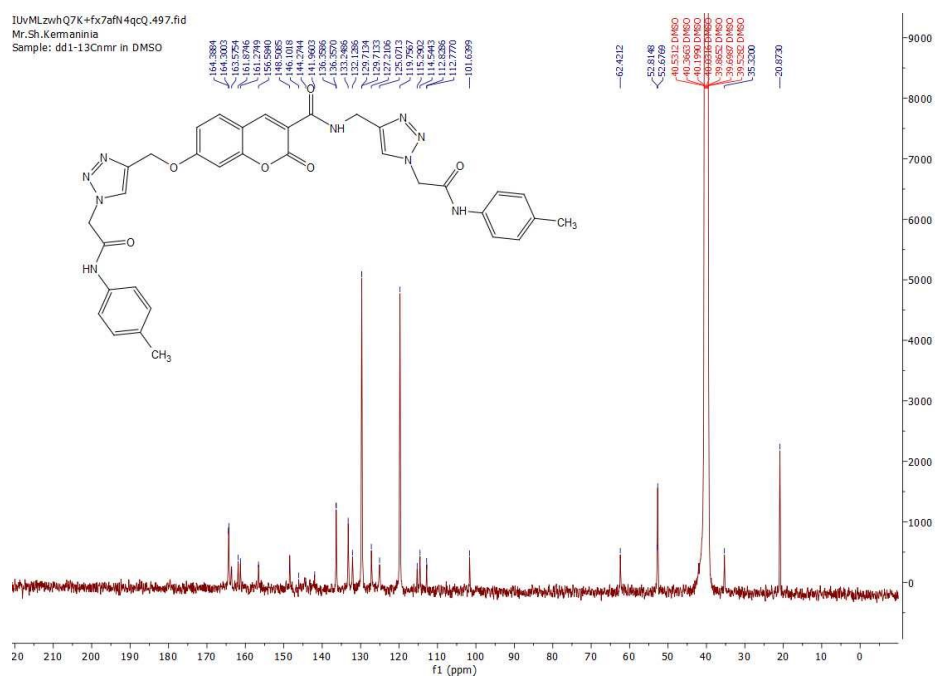

Fig. S16. HRMS of 12g

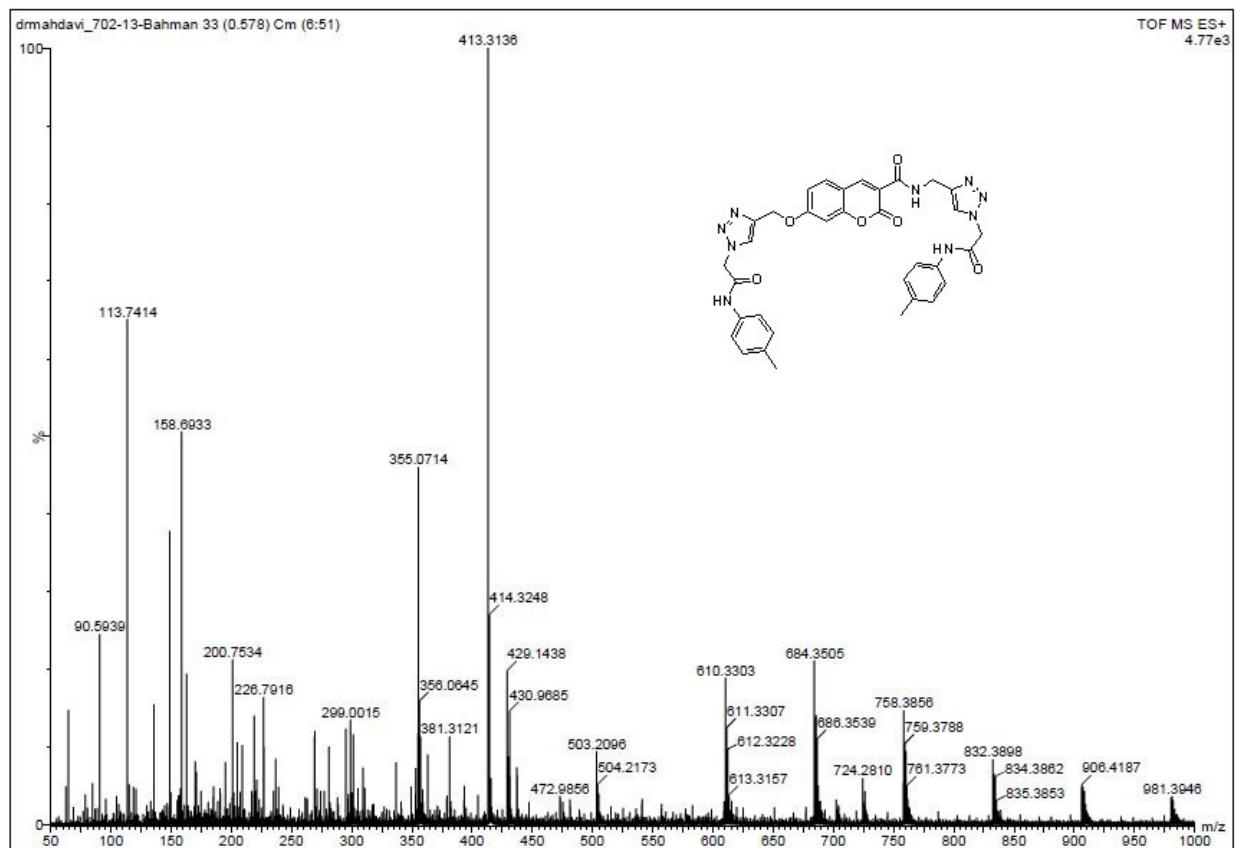

Fig. S17. <sup>1</sup>H NMR of 12h

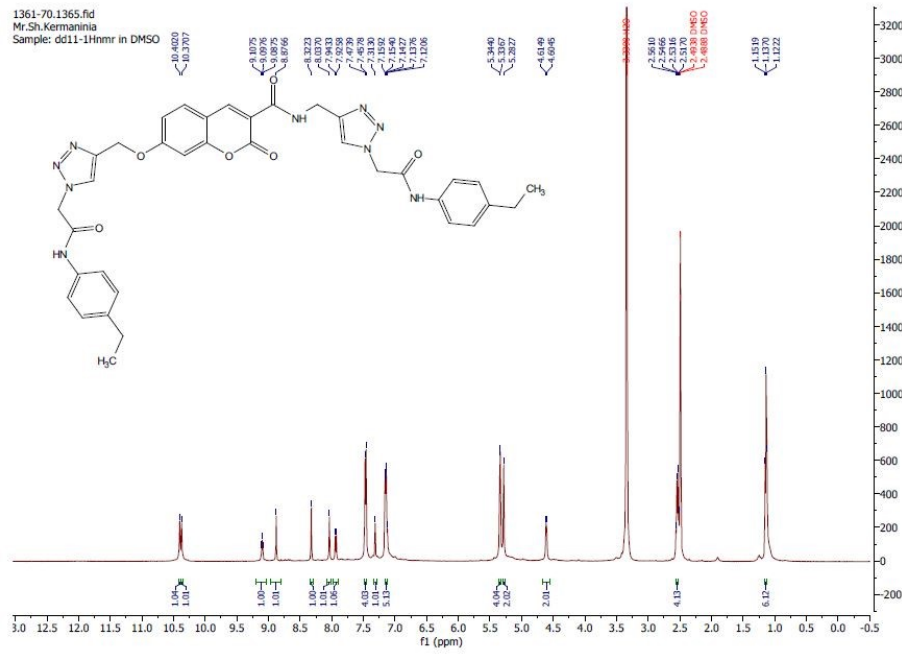

Fig. S18. <sup>13</sup>C NMR of 12h

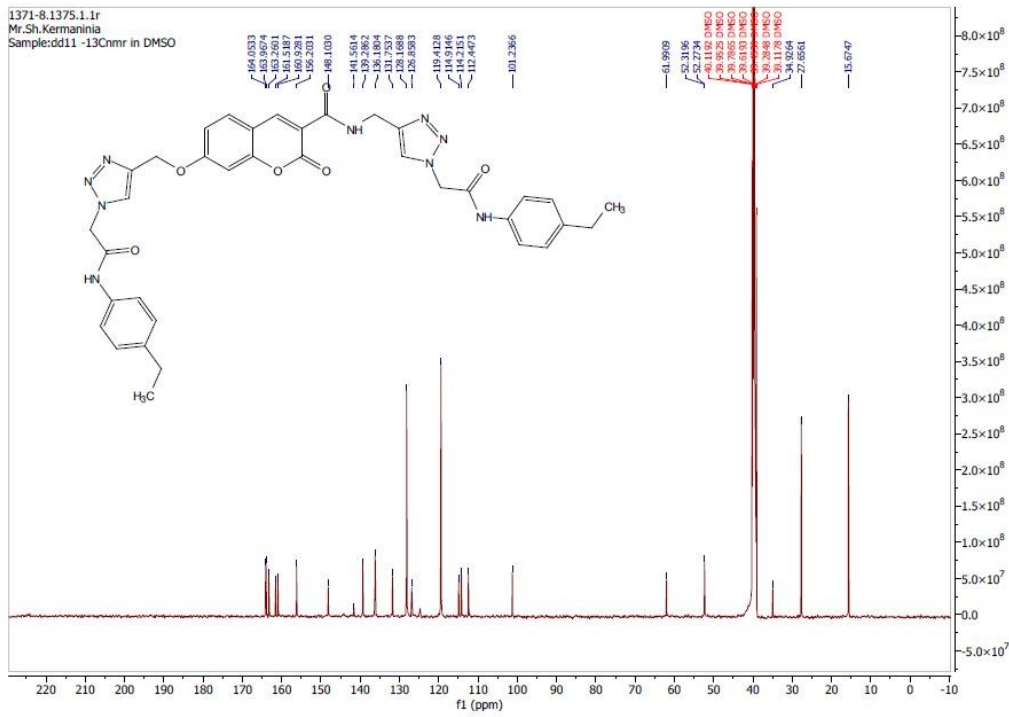





Fig. S23.  $^{19}\text{F}$  NMR of 12j

RarSD Ra0\_126.1336.fid  
Mr.Sh.Kermania  
Sample: dd14-  $^{19}\text{F}$ -nmr in DMSO

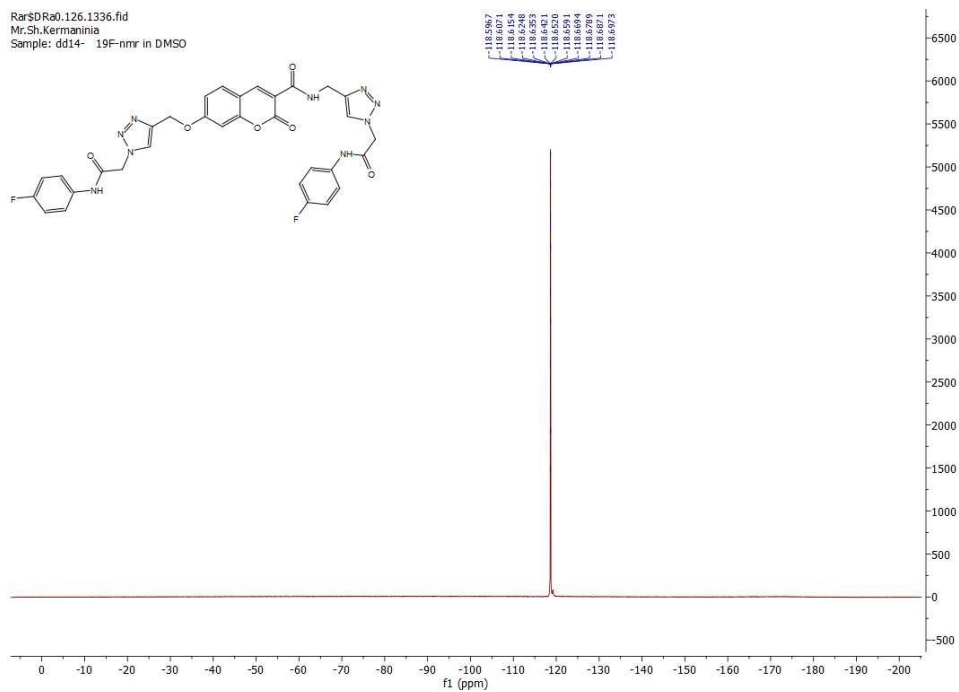





Fig. S28. <sup>1</sup>H NMR of 12m

Rar\$DRa0.158.1317.fid  
Mr. Sh. Kermani  
Sample: CF3- <sup>1</sup>Hnmr in DMSO

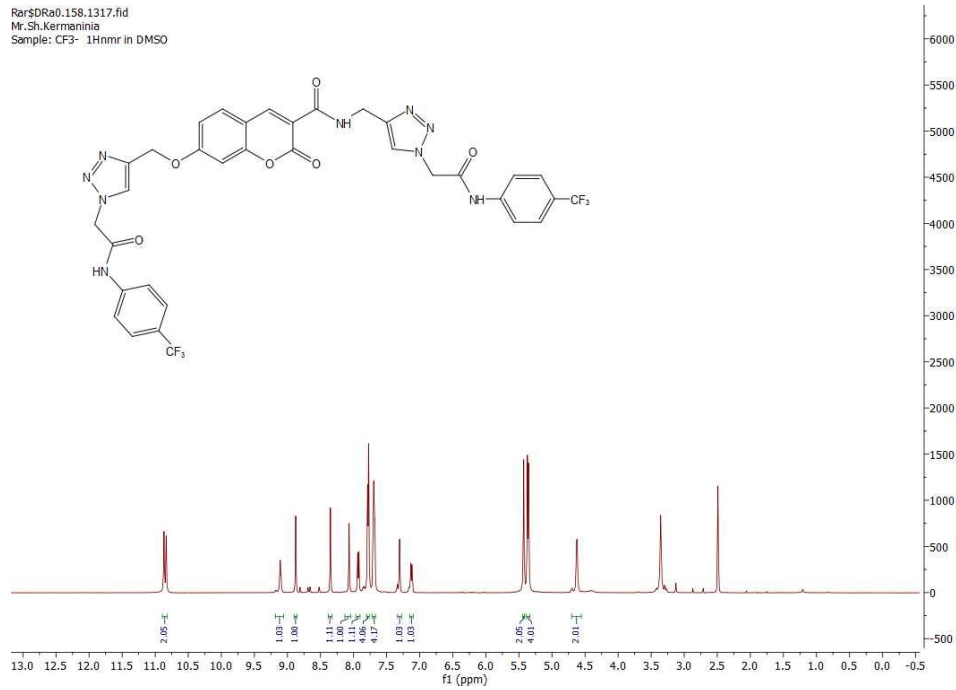

Fig. S29. <sup>13</sup>C NMR of 12m

Rar\$DRa0.318.1318.fid  
Mr. Sh. Kermani  
Sample: CF3- <sup>13</sup>Cnmr in DMSO

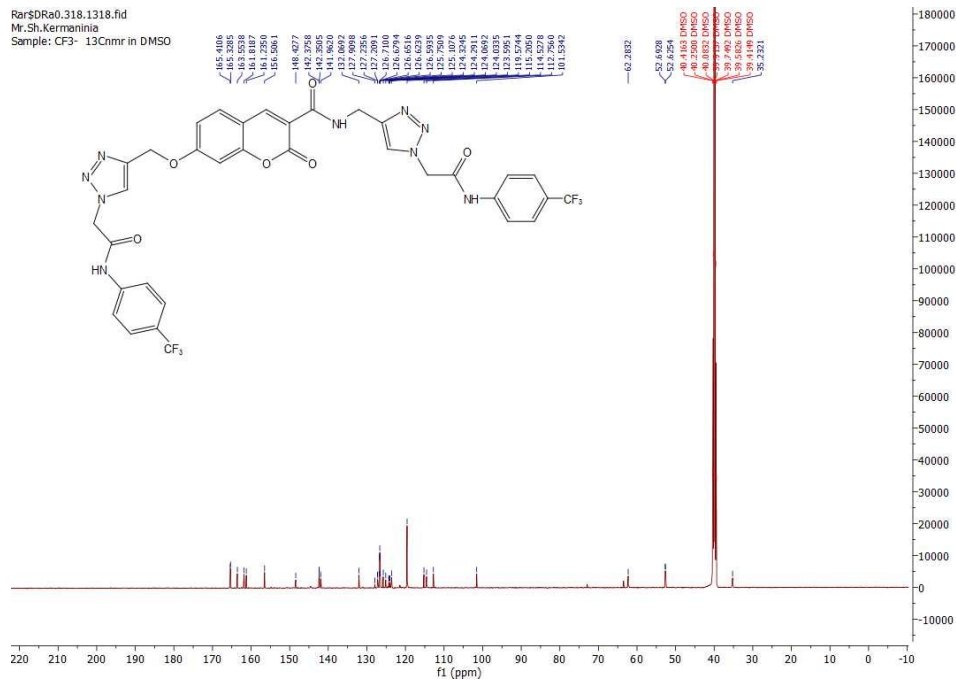

Fig. S30. <sup>1</sup>H NMR of 12n

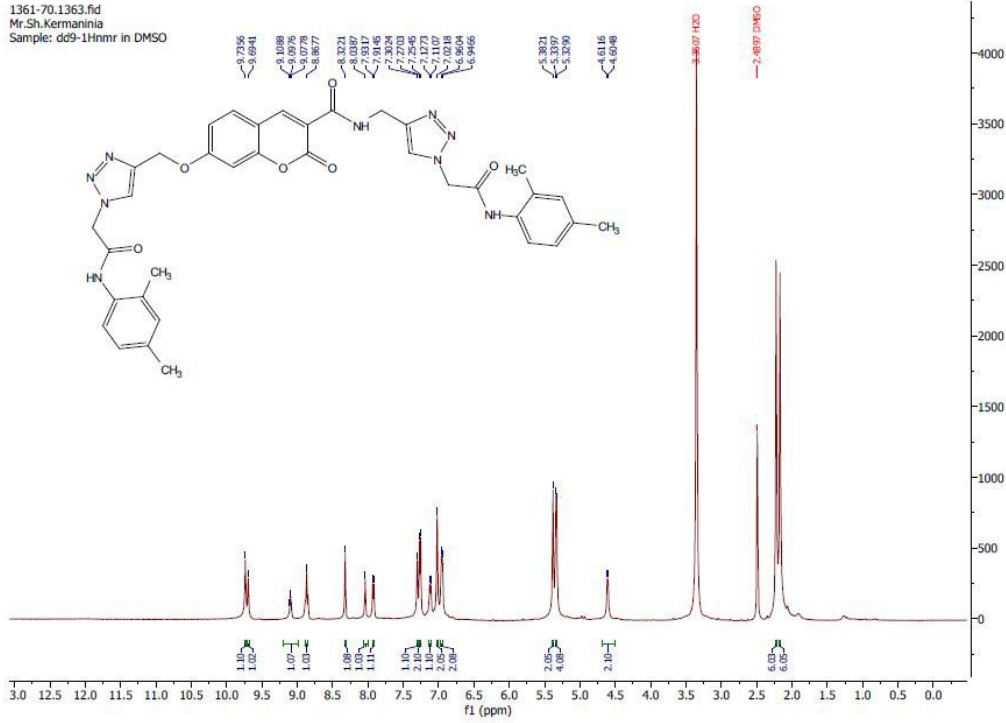

Fig. S31. <sup>13</sup>C NMR of 12n

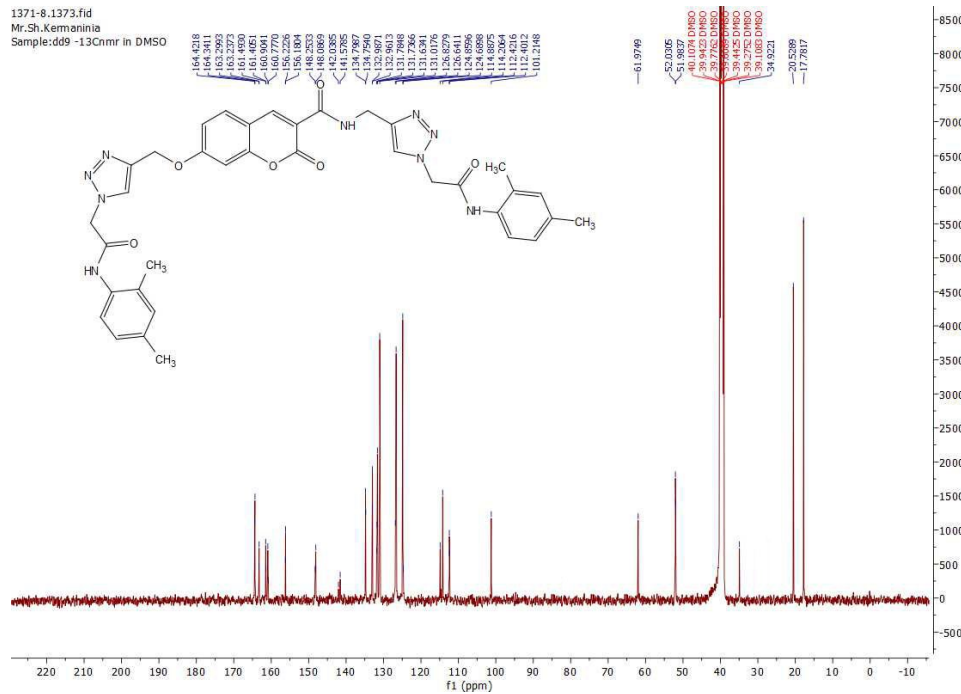

Fig. S32. <sup>1</sup>H NMR of 12o

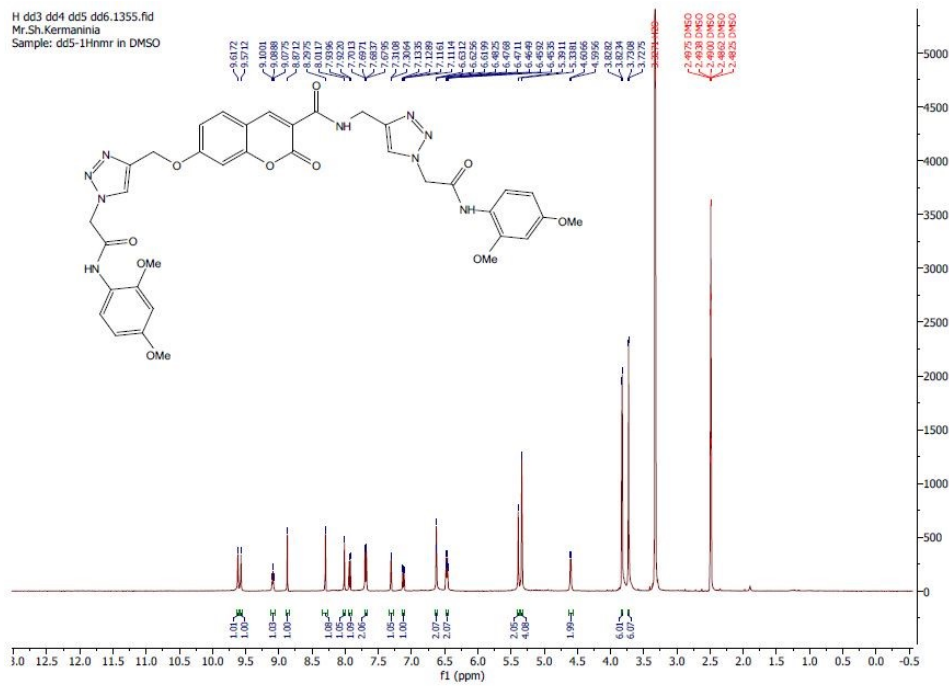

Fig. S33. <sup>13</sup>C NMR of 12o

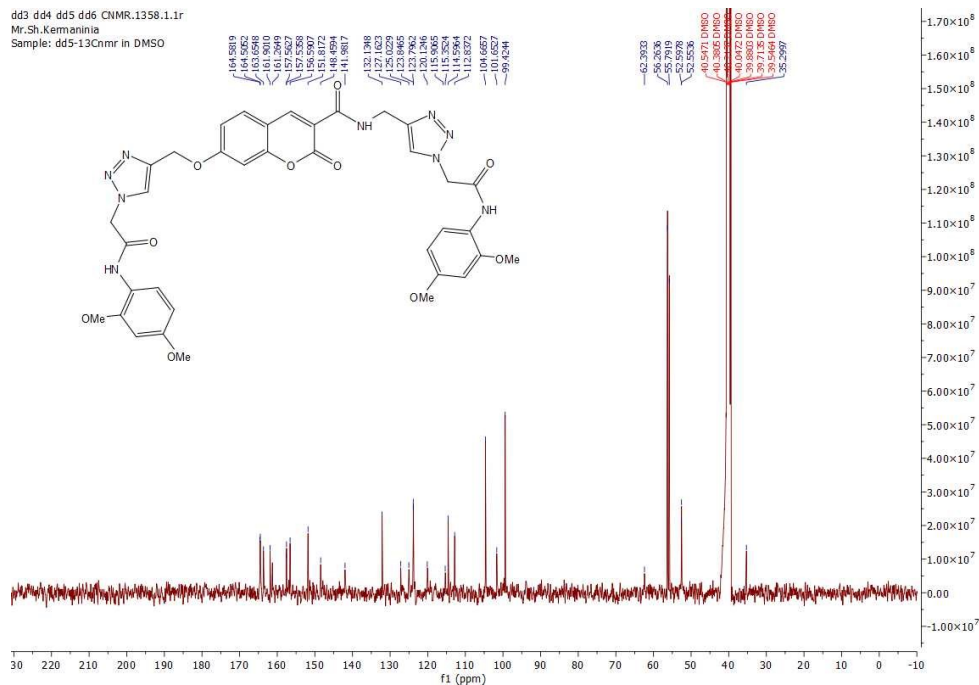



Fig. S36. <sup>1</sup>H NMR of 12q

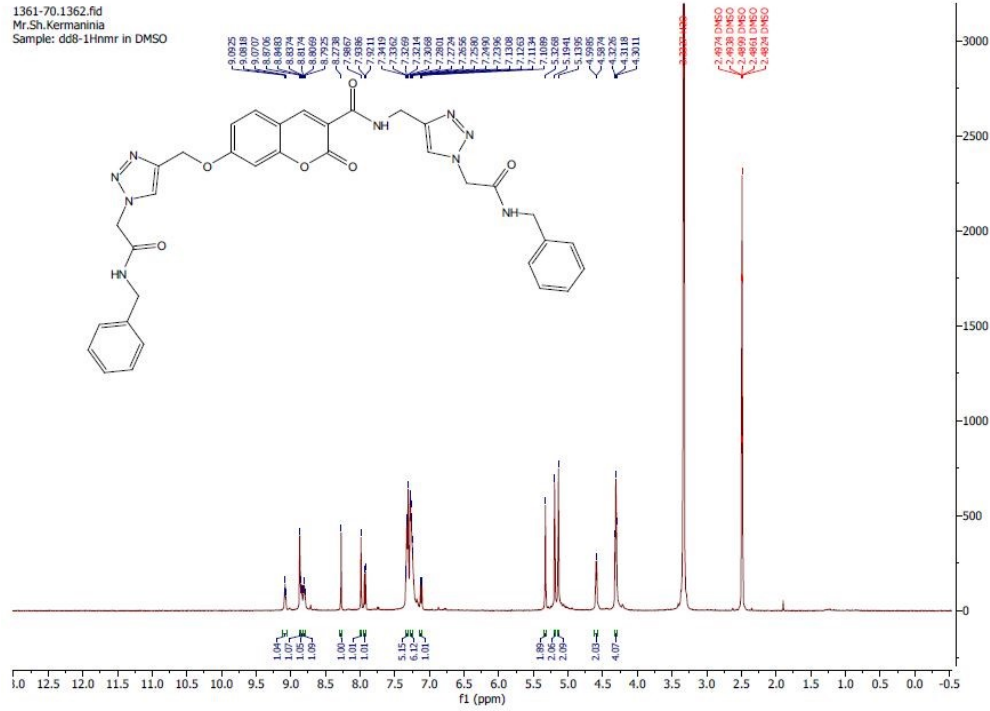

Fig. S37. <sup>13</sup>C NMR of 12q

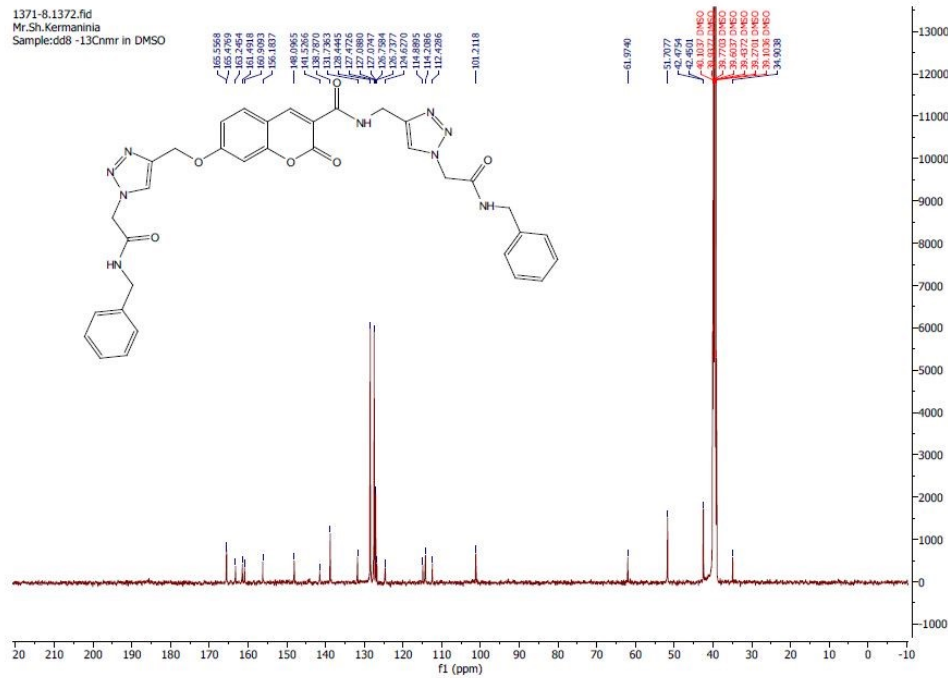



Fig. S40. <sup>1</sup>H NMR of 12s

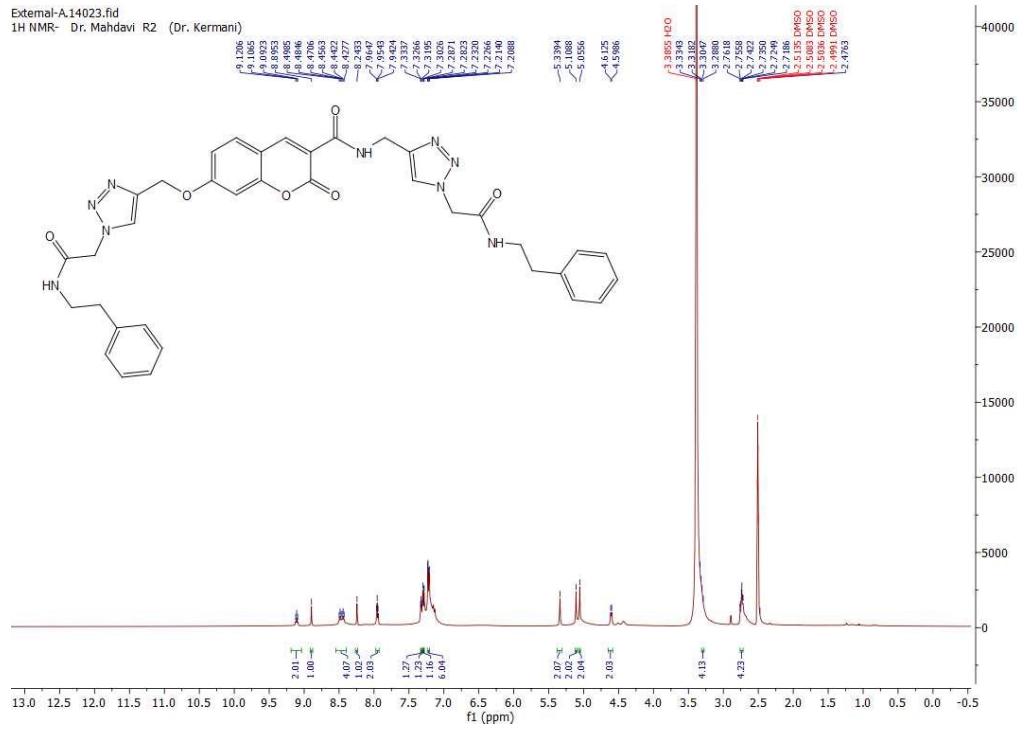

Fig. S41. <sup>13</sup>C NMR of 12s

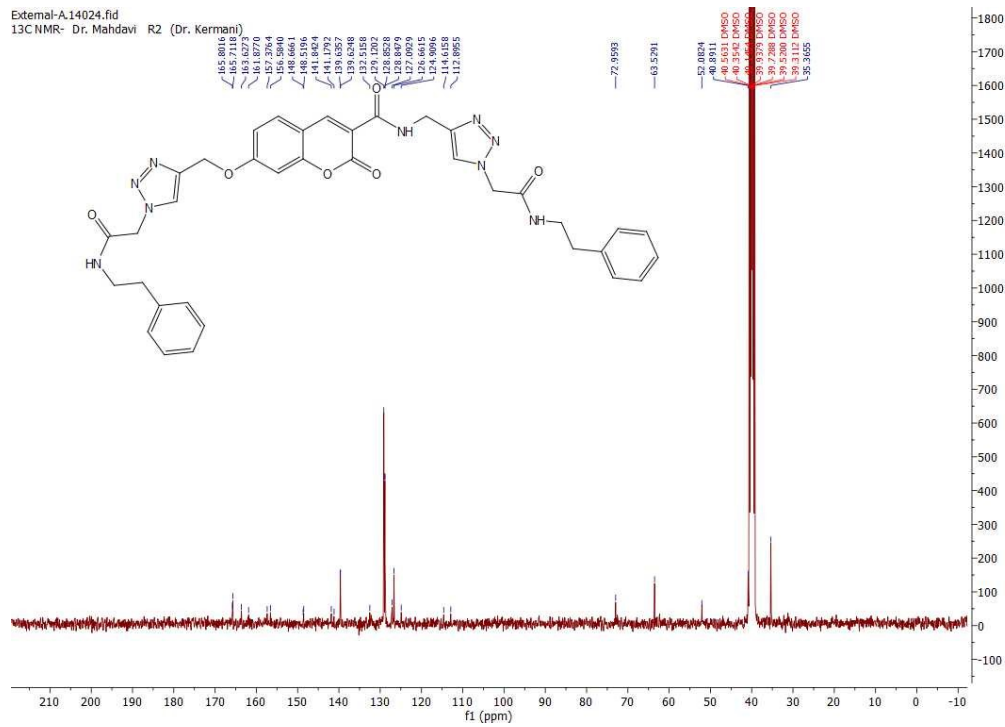

Supplement: d5ra09311b1.pdf [file d5ra09311b1.pdf]
